# Supplementary material
Source: MDPI journal article supplement (https://www.mdpi.com/2304-6775/11/3/38)
Supplement: s1 [file s1]

Archive with 1 entries (1 files):
- publications-2339005-supplementary.pdf
